# Supplementary material
Source: PubMed Central journal article supplement (PMC3362895)
Supplement: supp_mol.111.077347_Supplemental_Figure_S1.pdf [file supp_mol.111.077347_Supplemental_Figure_S1.pdf]

Molecular Pharmacology

**Thermodynamics and Docking of Agonists to the  $\beta$ 2-Adrenoceptor Determined Using [ $^3$ H]-(R,R')-4-Methoxyfenoterol as the Marker Ligand**

Lawrence Toll, Karolina Pajak, Anita Plazinska, Krzysztof Jozwiak, Lucita Jimenez, Joseph A. Kozocas, Mary J. Tanga, James E. Bupp, Irving W. Wainer,

**Supplemental Figure S1.** Inhibition curves generated using [ $^3$ H]M-Fen. Each experiment was conducted in triplicate. Data was analyzed using GraphPad Prism.

Supplemental Figure S1

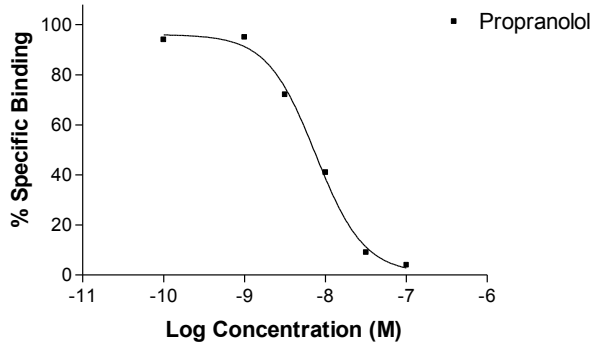

|           |             |
|-----------|-------------|
| HILLSLOPE | -1.450      |
| EC50      | 7.5480e-009 |

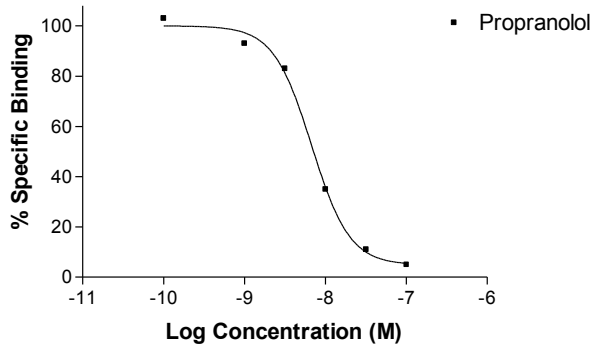

|           |             |
|-----------|-------------|
| HILLSLOPE | -1.850      |
| EC50      | 6.7610e-009 |

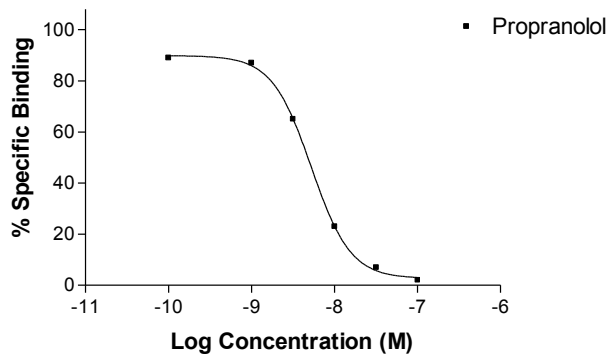

|           |             |
|-----------|-------------|
| HILLSLOPE | -1.837      |
| EC50      | 5.2590e-009 |

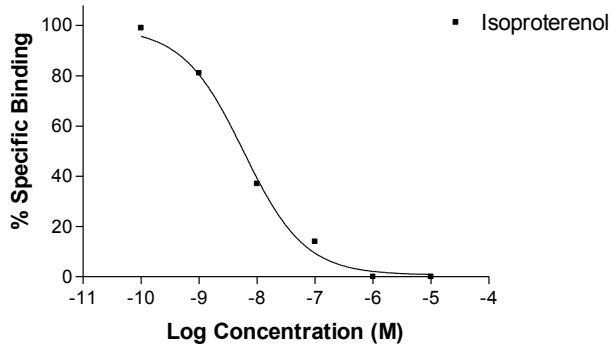

|           |             |
|-----------|-------------|
| HILLSLOPE | -0.8237     |
| EC50      | 5.8640e-009 |

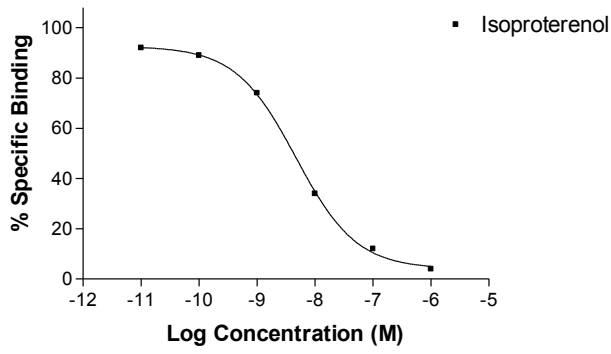

|           |             |
|-----------|-------------|
| HILLSLOPE | -0.8326     |
| EC50      | 4.6850e-009 |

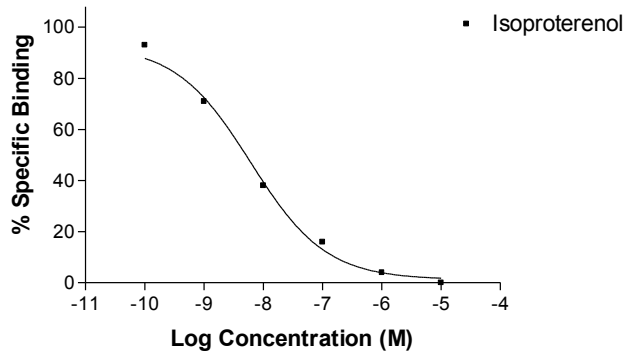

|           |             |
|-----------|-------------|
| HILLSLOPE | -0.6851     |
| EC50      | 6.1160e-009 |

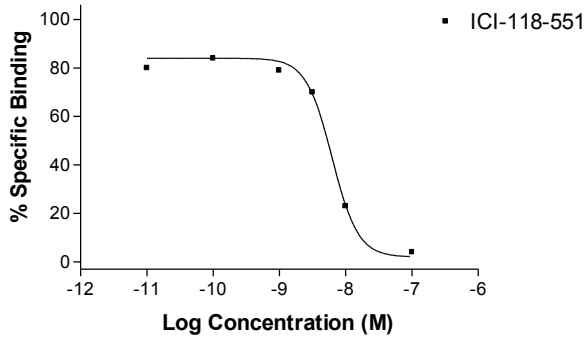

|           |             |
|-----------|-------------|
| HILLSLOPE | -2.215      |
| EC50      | 6.2460e-009 |

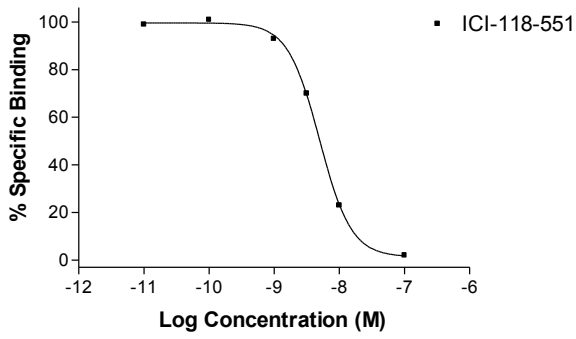

|           |             |
|-----------|-------------|
| HILLSLOPE | -1.784      |
| EC50      | 4.9850e-009 |

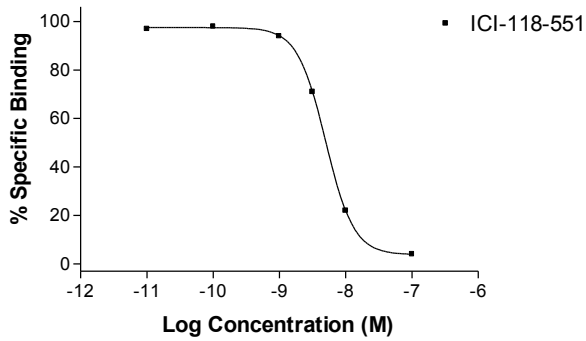

|           |             |
|-----------|-------------|
| HILLSLOPE | -2.042      |
| EC50      | 4.9870e-009 |

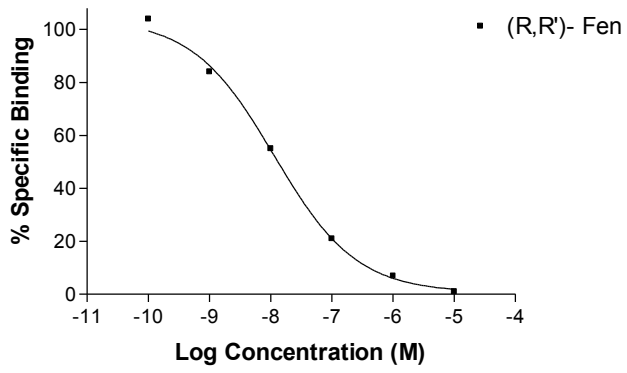

|           |             |
|-----------|-------------|
| HILLSLOPE | -0.6476     |
| EC50      | 1.1460e-008 |

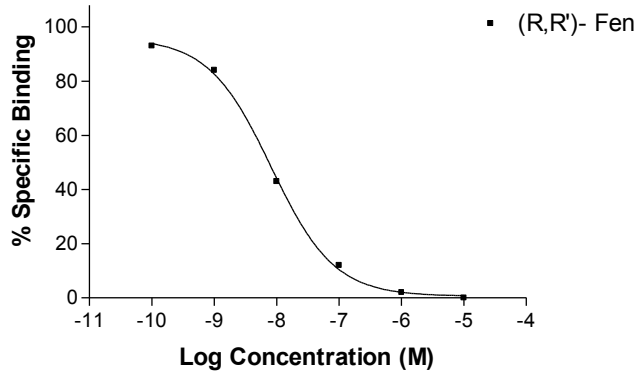

|           |             |
|-----------|-------------|
| HILLSLOPE | -0.8633     |
| EC50      | 8.1880e-009 |

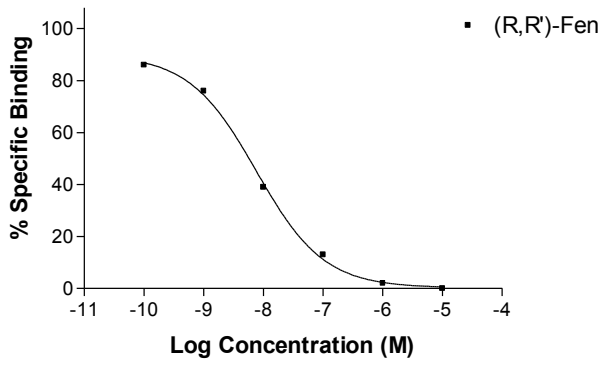

|           |             |
|-----------|-------------|
| HILLSLOPE | -0.7684     |
| EC50      | 7.6590e-009 |

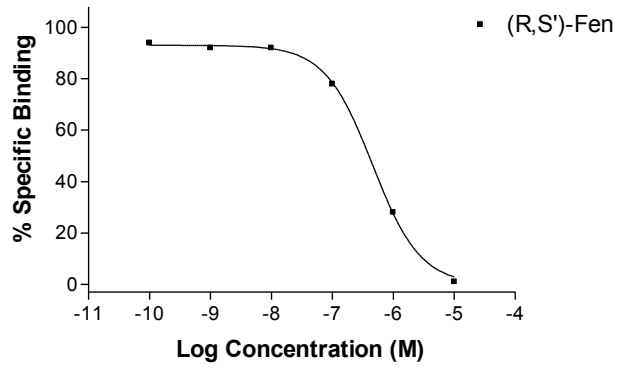

|           |             |
|-----------|-------------|
| HILLSLOPE | -1.110      |
| EC50      | 4.5580e-007 |

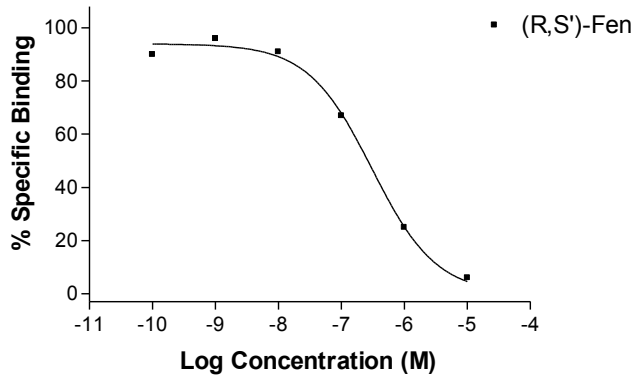

|           |             |
|-----------|-------------|
| HILLSLOPE | -0.8518     |
| EC50      | 3.0490e-007 |

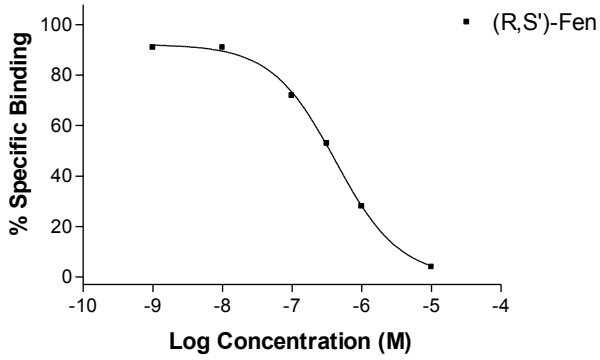

|           |             |
|-----------|-------------|
| HILLSLOPE | -0.9427     |
| EC50      | 4.1830e-007 |

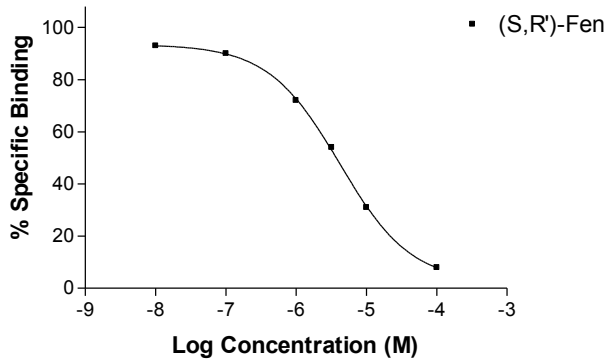

|           |             |
|-----------|-------------|
| HILLSLOPE | -0.8530     |
| EC50      | 4.1570e-006 |

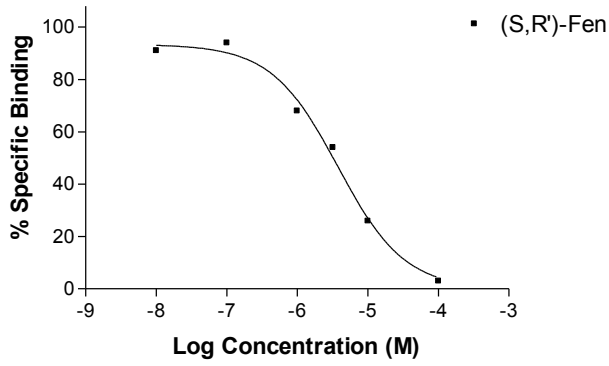

|           |             |
|-----------|-------------|
| HILLSLOPE | -0.9199     |
| EC50      | 3.7650e-006 |

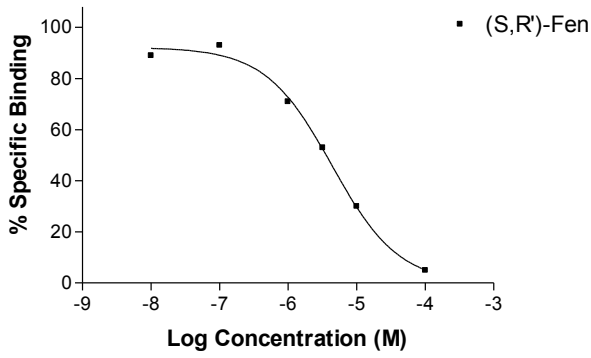

|           |             |
|-----------|-------------|
| HILLSLOPE | -0.8914     |
| EC50      | 4.3620e-006 |

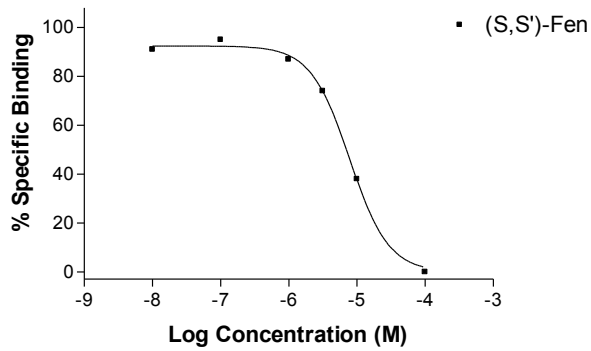

|           |             |
|-----------|-------------|
| HILLSLOPE | -1.517      |
| EC50      | 7.8290e-006 |



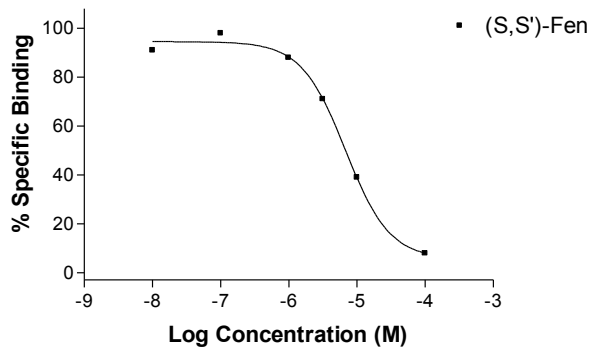

|           |             |
|-----------|-------------|
| HILLSLOPE | -1.340      |
| EC50      | 6.8060e-006 |

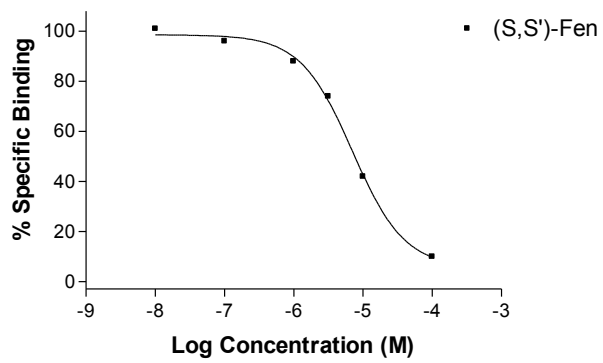

|           |             |
|-----------|-------------|
| HILLSLOPE | -1.155      |
| EC50      | 7.0590e-006 |

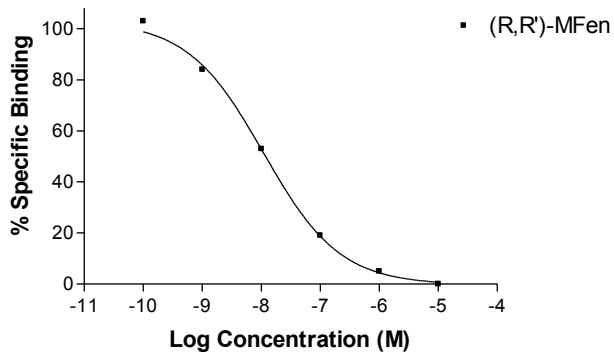

|           |             |
|-----------|-------------|
| HILLSLOPE | -0.6736     |
| EC50      | 1.0940e-008 |

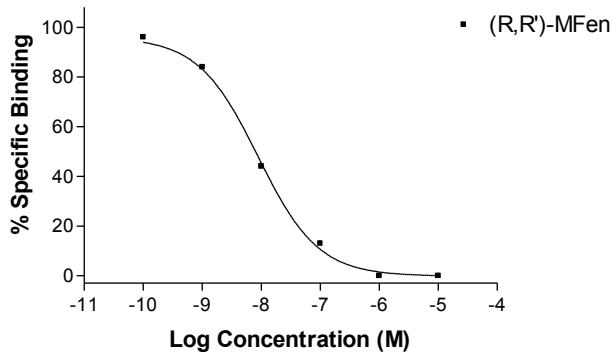

|           |             |
|-----------|-------------|
| HILLSLOPE | -0.8550     |
| EC50      | 8.8640e-009 |

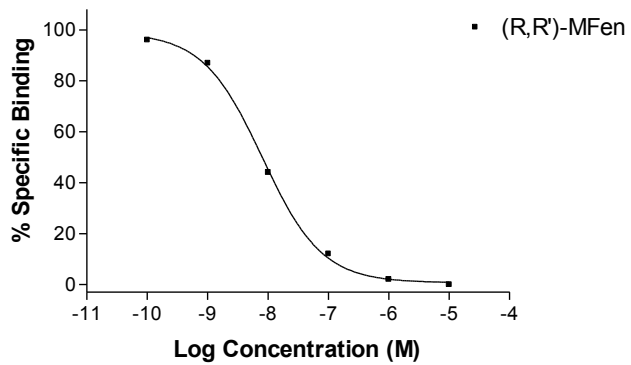

|           |             |
|-----------|-------------|
| HILLSLOPE | -0.8834     |
| EC50      | 8.0820e-009 |

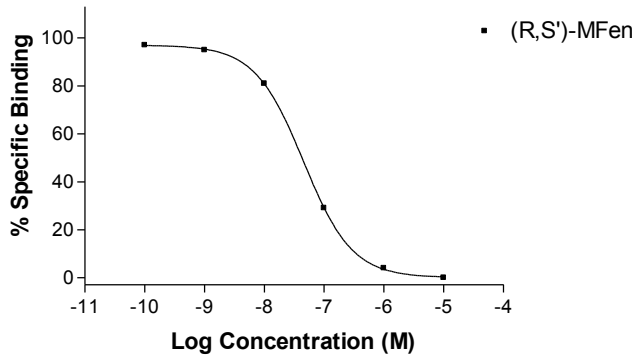

|           |             |
|-----------|-------------|
| HILLSLOPE | -1.067      |
| EC50      | 4.5270e-008 |

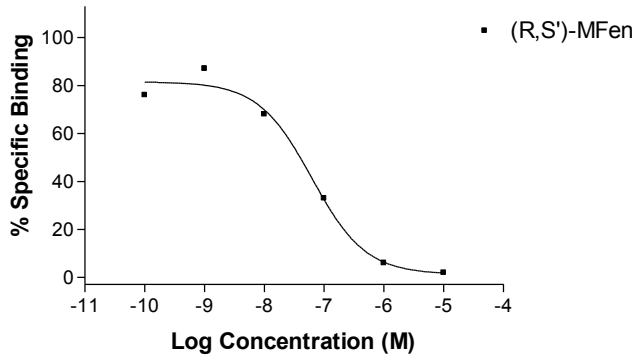

|           |             |
|-----------|-------------|
| HILLSLOPE | -0.9678     |
| EC50      | 6.2380e-008 |

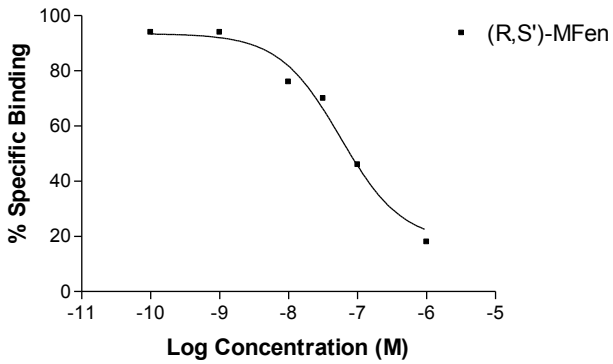

|           |             |
|-----------|-------------|
| HILLSLOPE | -0.9712     |
| EC50      | 5.6790e-008 |

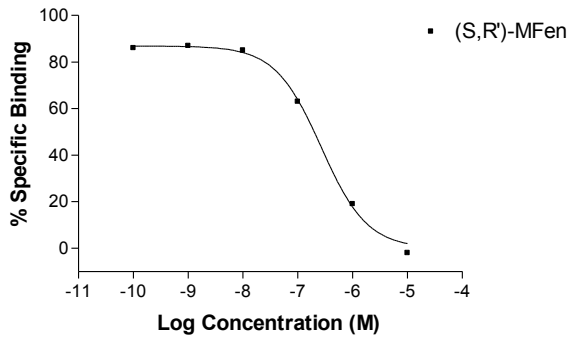

|           |             |
|-----------|-------------|
| HILLSLOPE | -1.033      |
| EC50      | 2.6700e-007 |

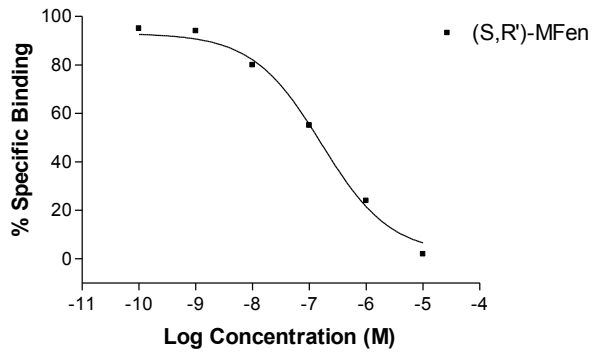

|           |             |
|-----------|-------------|
| HILLSLOPE | -0.7144     |
| EC50      | 1.6260e-007 |

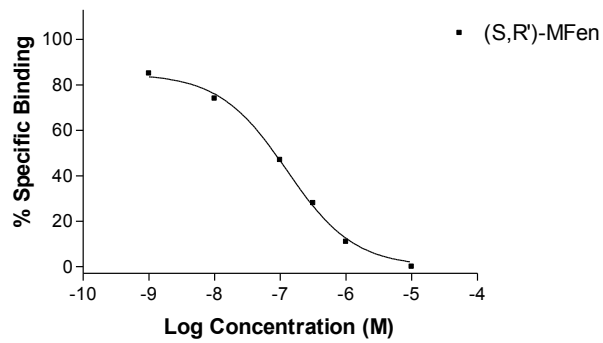

|           |             |
|-----------|-------------|
| HILLSLOPE | -0.8449     |
| EC50      | 1.2520e-007 |

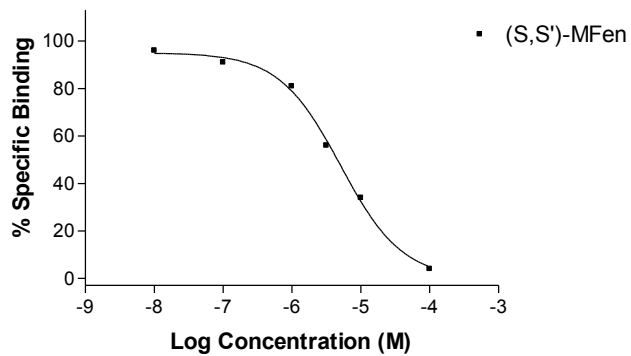

|           |             |
|-----------|-------------|
| HILLSLOPE | -0.9715     |
| EC50      | 5.0940e-006 |

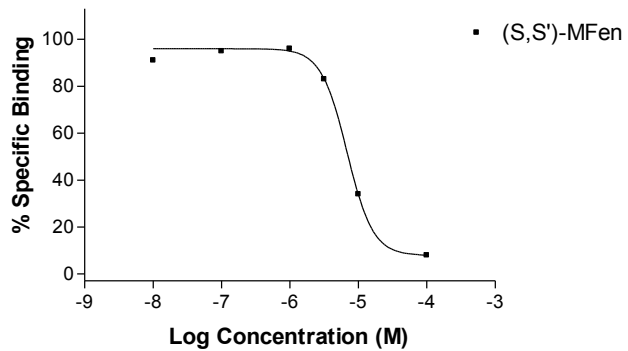

|           |             |
|-----------|-------------|
| HILLSLOPE | -2.292      |
| EC50      | 6.8530e-006 |

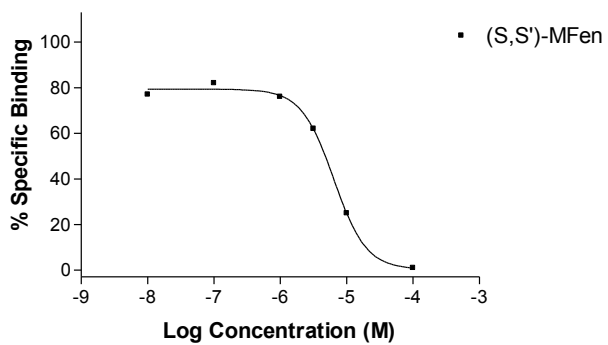

|           |             |
|-----------|-------------|
| HILLSLOPE | -1.775      |
| EC50      | 6.4160e-006 |

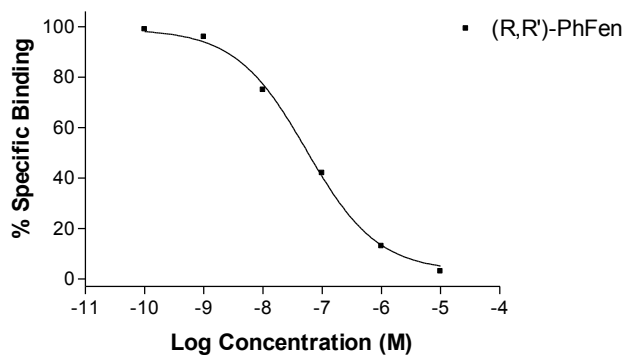

|           |             |
|-----------|-------------|
| HILLSLOPE | -0.7225     |
| EC50      | 5.4170e-008 |

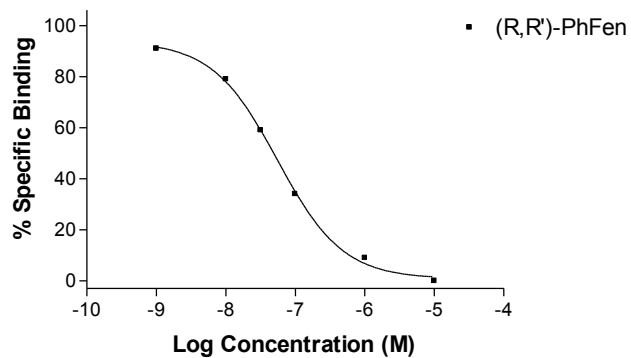

|           |             |
|-----------|-------------|
| HILLSLOPE | -0.9233     |
| EC50      | 5.5530e-008 |

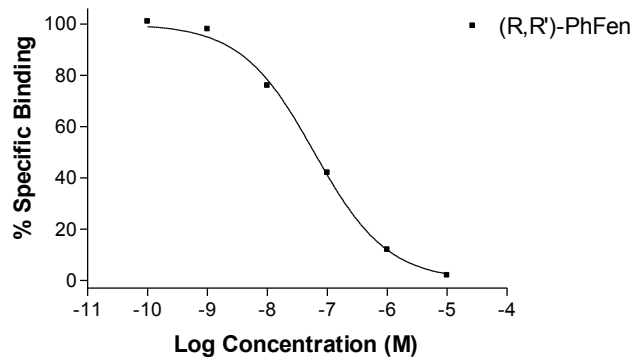

|           |             |
|-----------|-------------|
| HILLSLOPE | -0.7124     |
| EC50      | 6.0350e-008 |

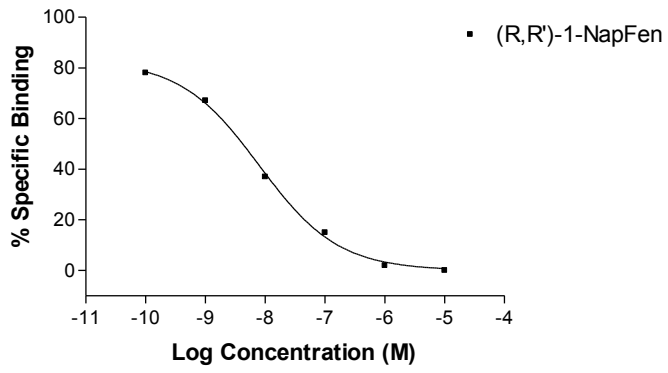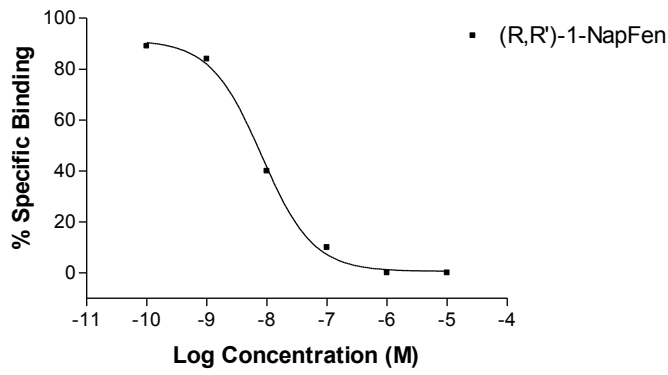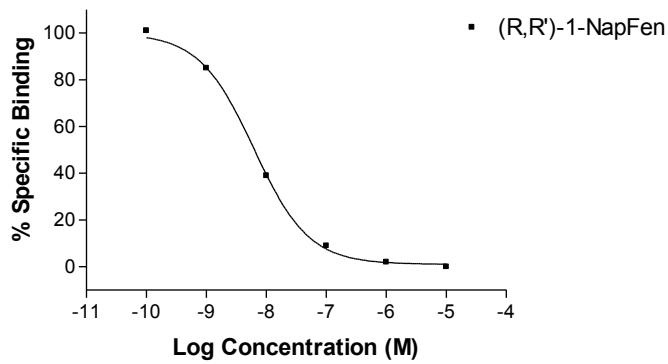

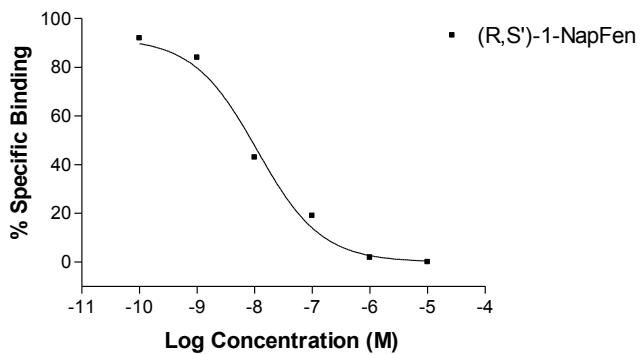

|           |             |
|-----------|-------------|
| HILLSLOPE | -0.7800     |
| EC50      | 1.1010e-008 |

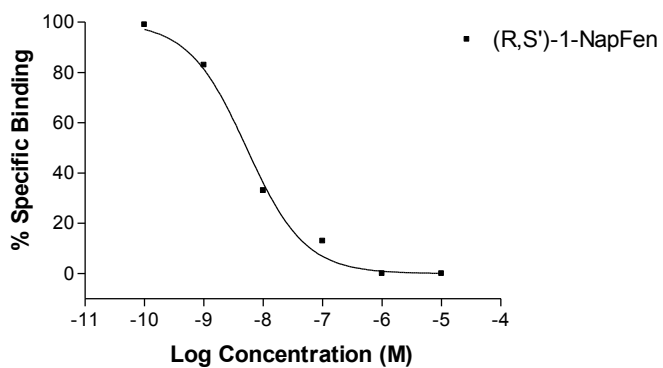

|           |             |
|-----------|-------------|
| HILLSLOPE | -0.8858     |
| EC50      | 5.2360e-009 |

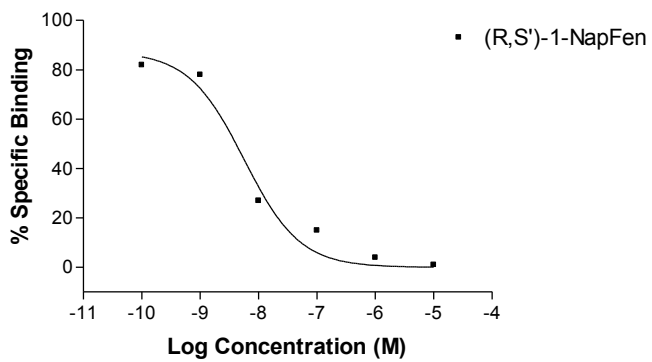

|           |             |
|-----------|-------------|
| HILLSLOPE | -0.9112     |
| EC50      | 5.6540e-009 |



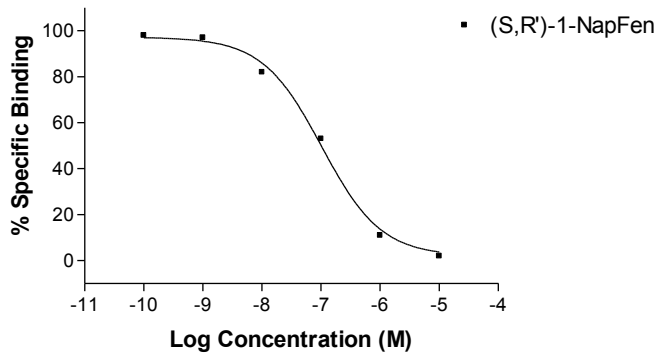

|           |             |
|-----------|-------------|
| HILLSLOPE | -0.8637     |
| EC50      | 1.0270e-007 |

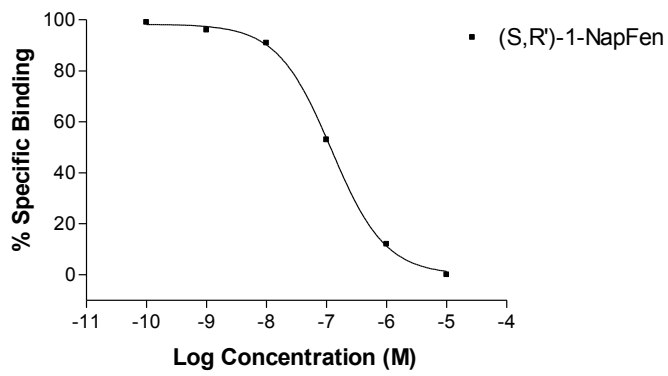

|           |             |
|-----------|-------------|
| HILLSLOPE | -0.9655     |
| EC50      | 1.1980e-007 |

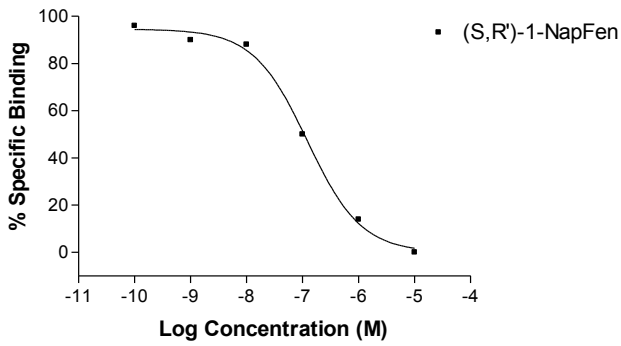

|           |             |
|-----------|-------------|
| HILLSLOPE | -0.9022     |
| EC50      | 1.2120e-007 |

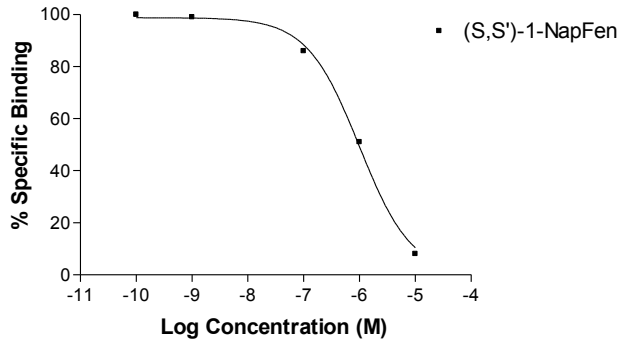

|           |             |
|-----------|-------------|
| HILLSLOPE | -0.9282     |
| EC50      | 9.9120e-007 |

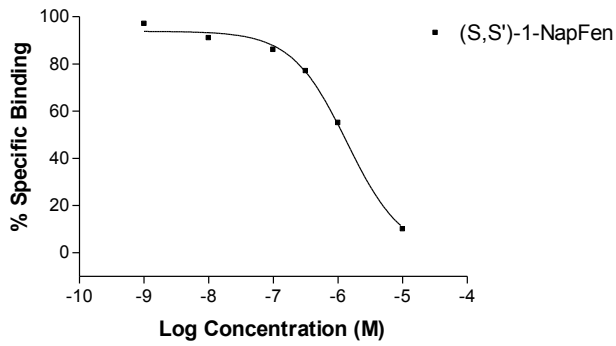

|           |             |
|-----------|-------------|
| HILLSLOPE | -1.018      |
| EC50      | 1.3690e-006 |

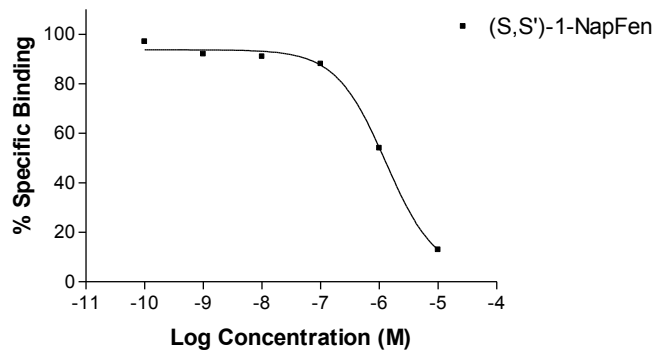

|           |             |
|-----------|-------------|
| HILLSLOPE | -1.023      |
| EC50      | 1.2780e-006 |

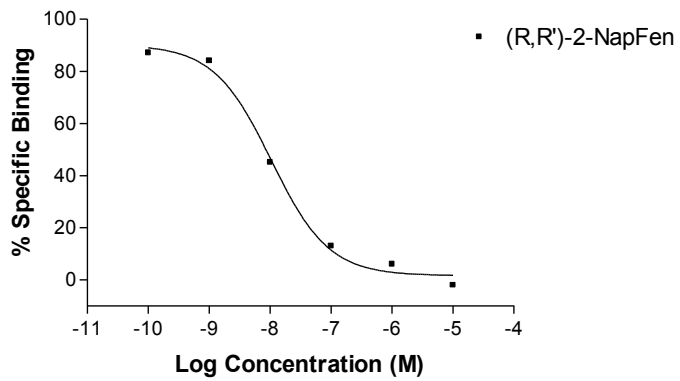

|           |             |
|-----------|-------------|
| HILLSLOPE | -0.9217     |
| EC50      | 1.0410e-008 |

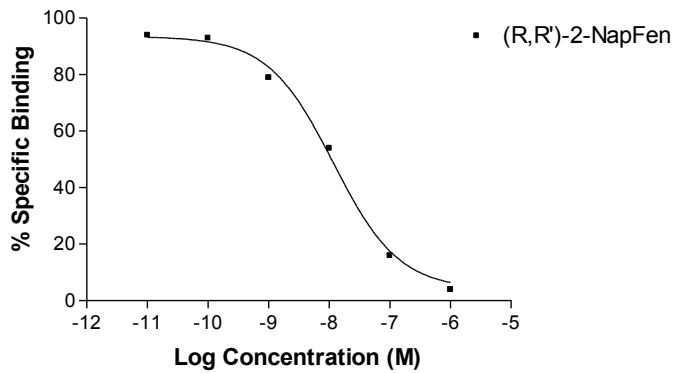

|           |             |
|-----------|-------------|
| HILLSLOPE | -0.8047     |
| EC50      | 1.1680e-008 |

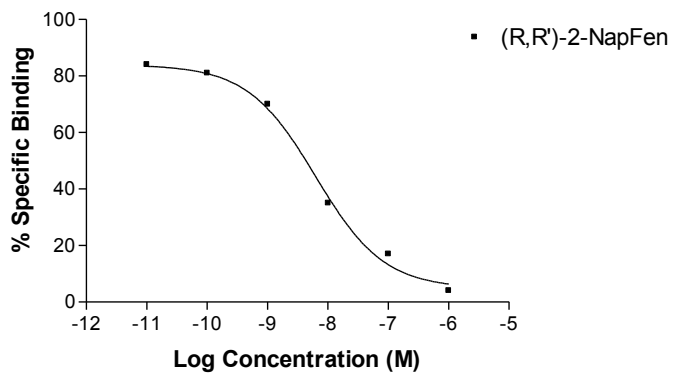

|           |             |
|-----------|-------------|
| HILLSLOPE | -0.7687     |
| EC50      | 6.2600e-009 |

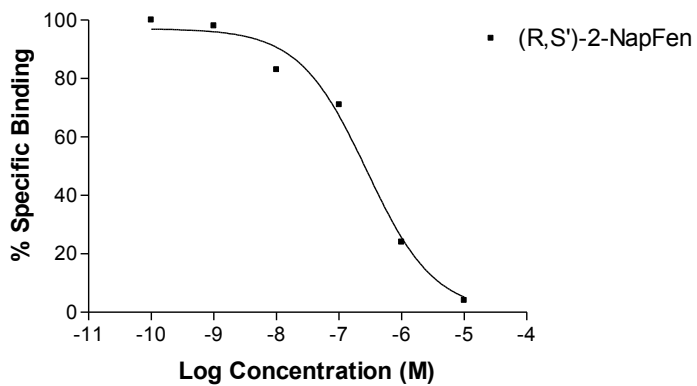

|           |             |
|-----------|-------------|
| HILLSLOPE | -0.8013     |
| EC50      | 2.7610e-007 |

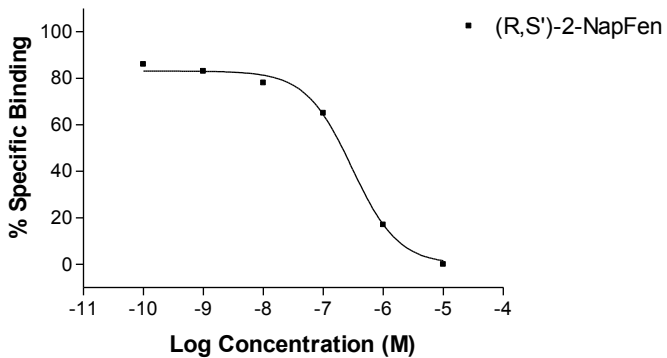

|           |             |
|-----------|-------------|
| HILLSLOPE | -1.123      |
| EC50      | 2.9950e-007 |

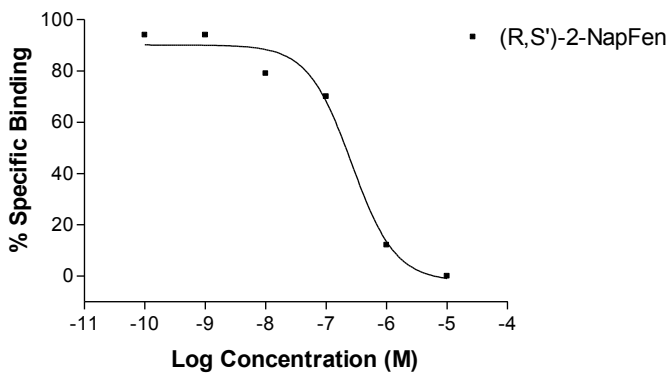

|           |             |
|-----------|-------------|
| HILLSLOPE | -1.202      |
| EC50      | 2.6190e-007 |

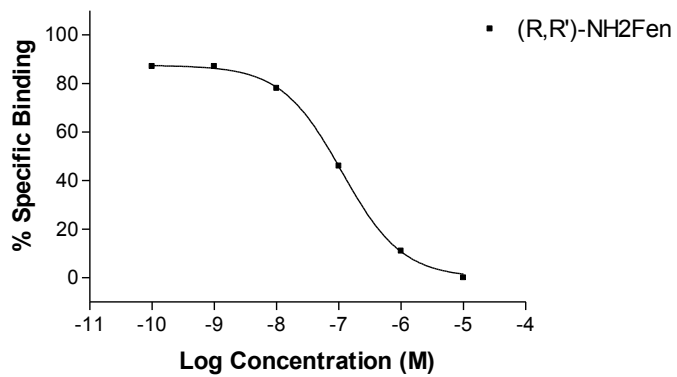

|           |             |
|-----------|-------------|
| HILLSLOPE | -0.8958     |
| EC50      | 1.1130e-007 |

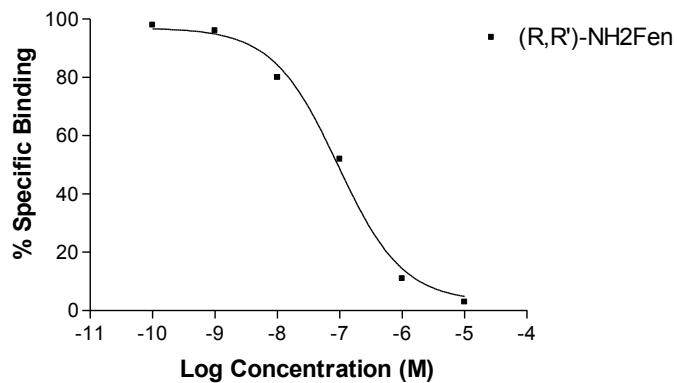

|           |             |
|-----------|-------------|
| HILLSLOPE | -0.8329     |
| EC50      | 9.2810e-008 |

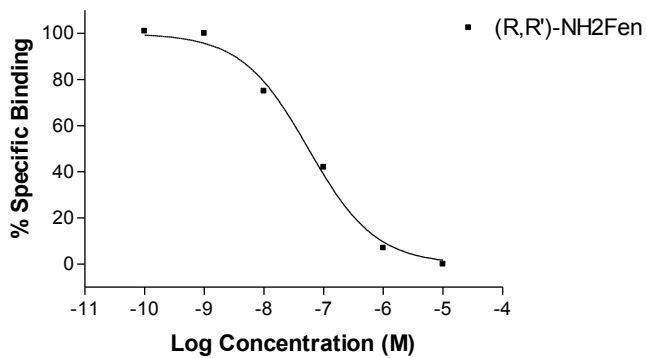

|           |             |
|-----------|-------------|
| HILLSLOPE | -0.7748     |
| EC50      | 5.5660e-008 |

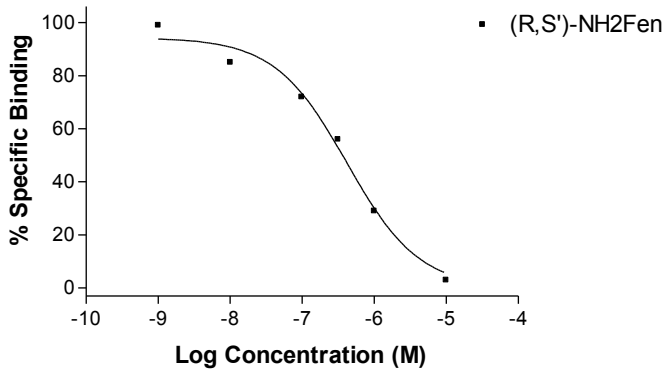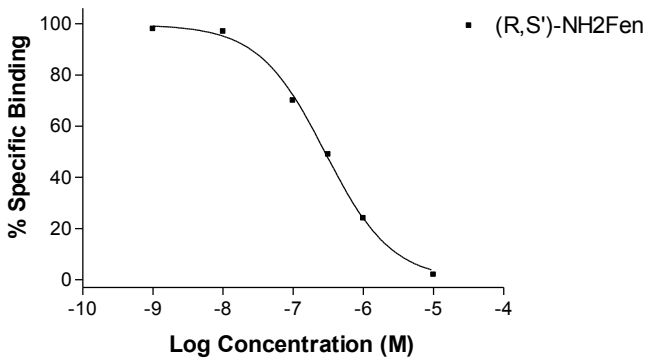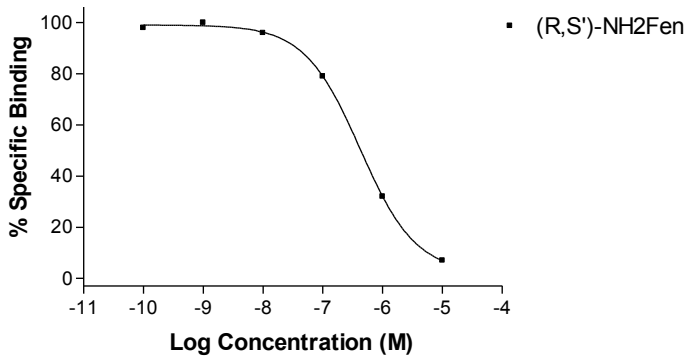

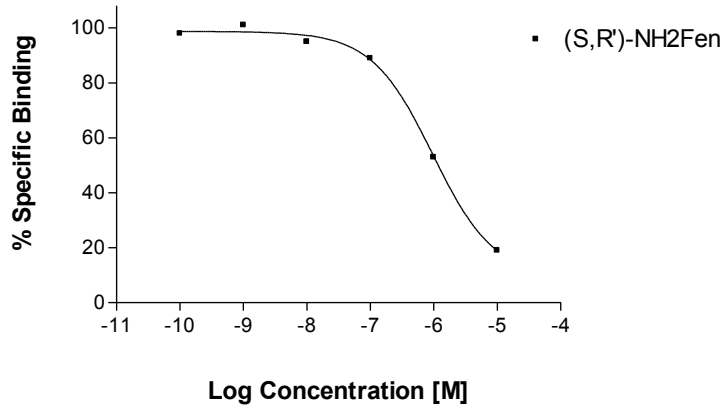

|           |             |
|-----------|-------------|
| HILLSLOPE | -0.9023     |
| EC50      | 9.5560e-007 |

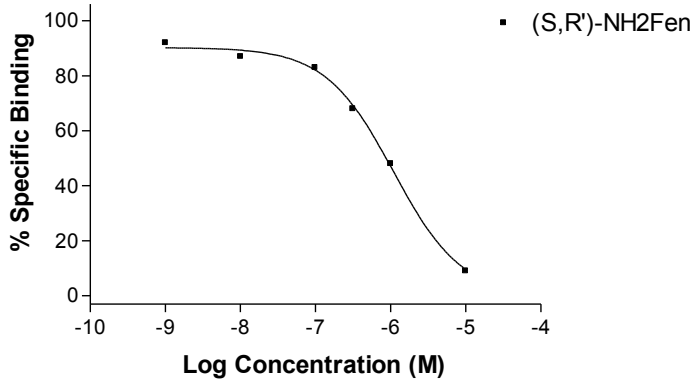

|           |             |
|-----------|-------------|
| HILLSLOPE | -0.9580     |
| EC50      | 1.0960e-006 |

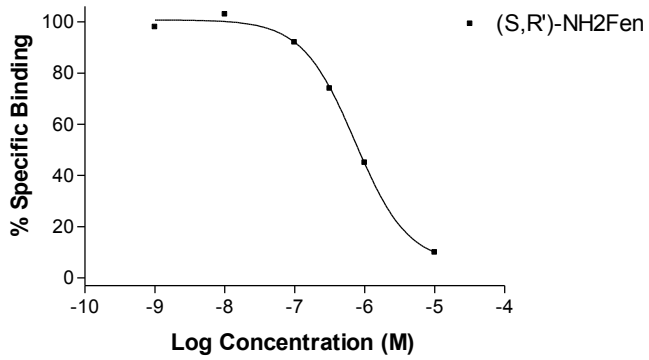

|           |             |
|-----------|-------------|
| HILLSLOPE | -1.147      |
| EC50      | 7.3140e-007 |

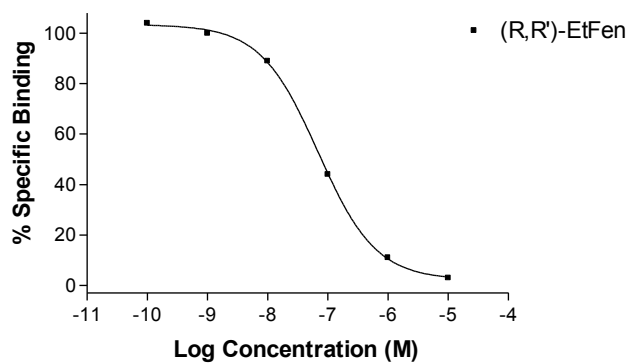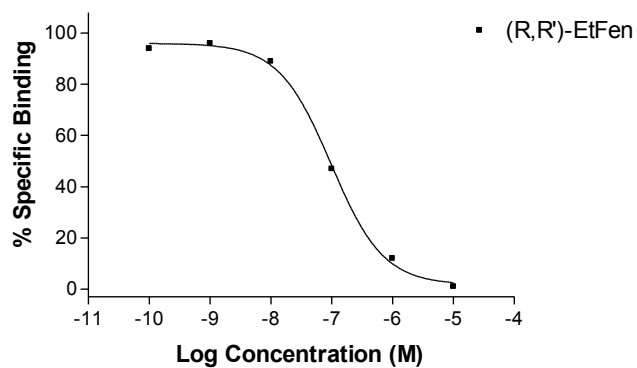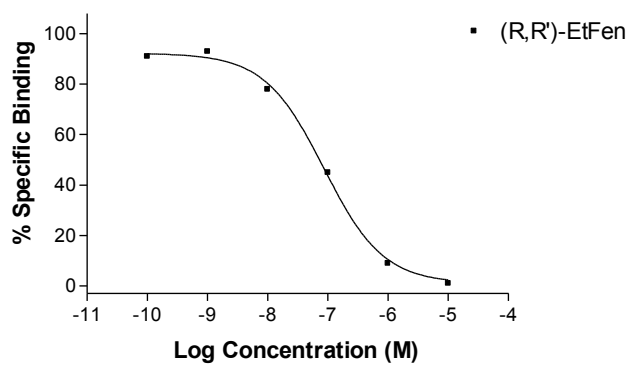



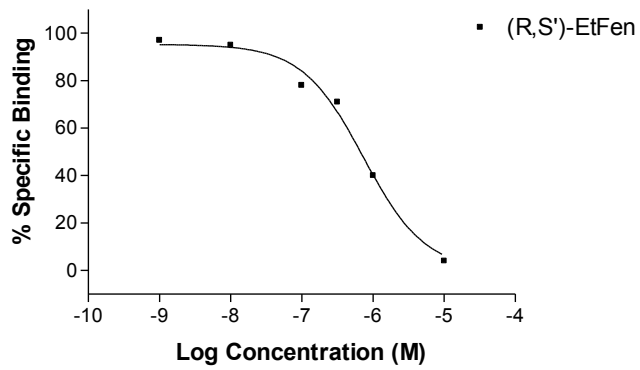

|           |             |
|-----------|-------------|
| HILLSLOPE | -1.004      |
| EC50      | 7.3800e-007 |

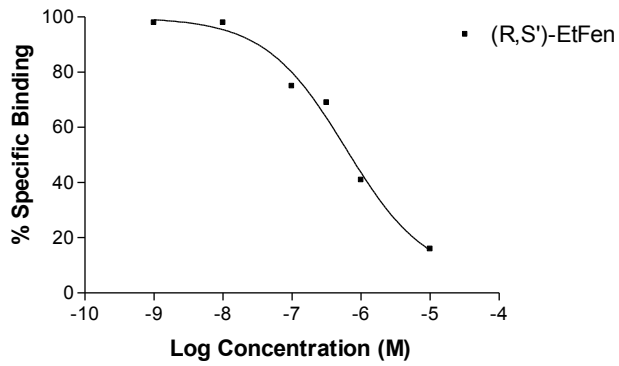

|           |             |
|-----------|-------------|
| HILLSLOPE | -0.7383     |
| EC50      | 6.0260e-007 |

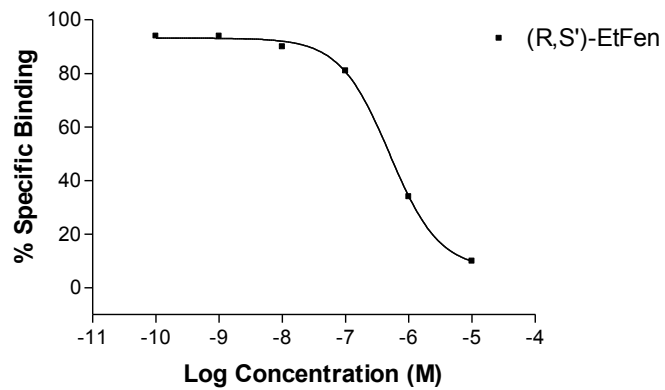

|           |             |
|-----------|-------------|
| HILLSLOPE | -1.103      |
| EC50      | 4.9530e-007 |

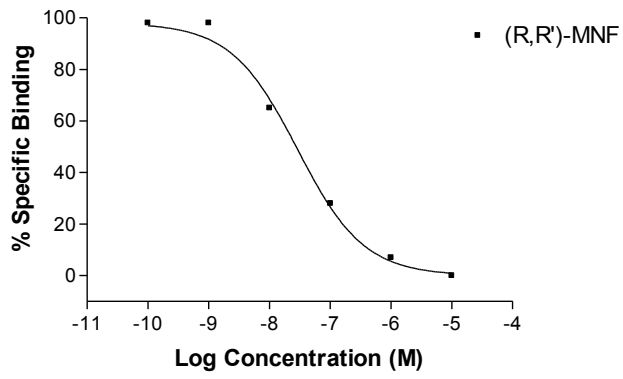

|           |             |
|-----------|-------------|
| HILLSLOPE | -0.7948     |
| EC50      | 2.8890e-008 |

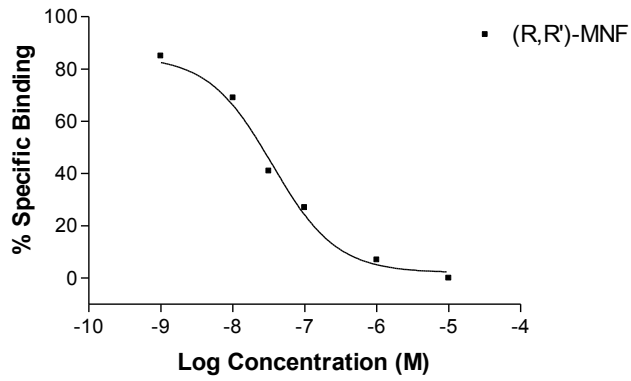

|           |             |
|-----------|-------------|
| HILLSLOPE | -0.9730     |
| EC50      | 3.5300e-008 |

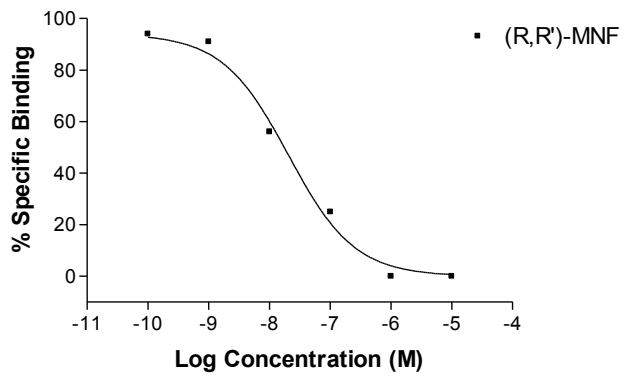

|           |             |
|-----------|-------------|
| HILLSLOPE | -0.7984     |
| EC50      | 2.0490e-008 |

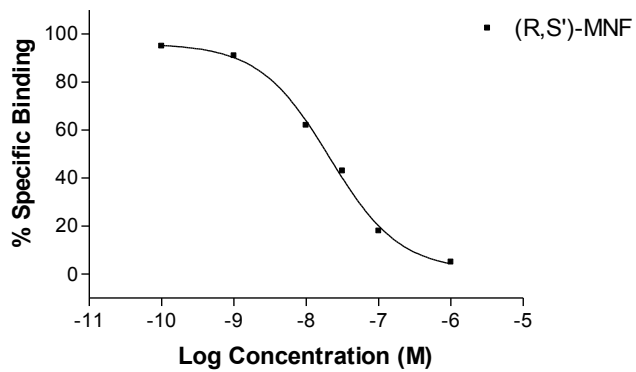

|           |             |
|-----------|-------------|
| HILLSLOPE | -0.8947     |
| EC50      | 2.0910e-008 |

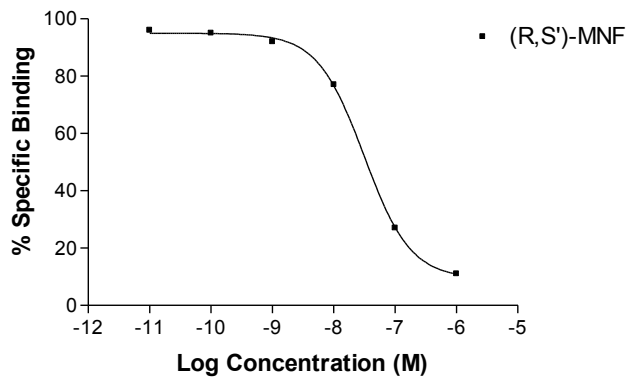

|           |             |
|-----------|-------------|
| HILLSLOPE | -1.146      |
| EC50      | 3.1190e-008 |

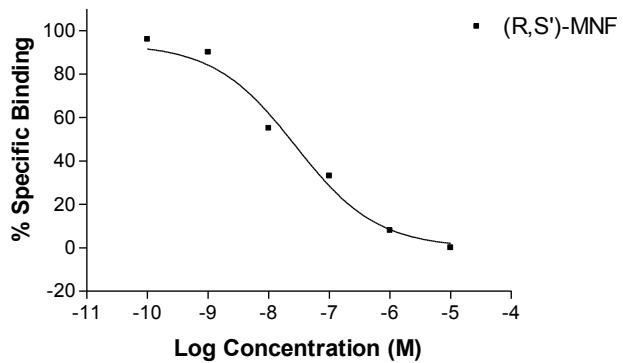

|           |             |
|-----------|-------------|
| HILLSLOPE | -0.6471     |
| EC50      | 2.7530e-008 |
