# Supplementary material
Source: PubMed Central journal article supplement (PMC3362895)
Supplement: supp_mol.111.077347_Supplemental_figure_S2.pdf [file supp_mol.111.077347_Supplemental_figure_S2.pdf]

## Molecular Pharmacology

### Thermodynamics and Docking of Agonists to the $\beta$ 2-Adrenoceptor Determined Using [ $^3$ H]-(R,R')-4-Methoxyfenoterol as the Marker Ligand

Lawrence Toll, Karolina Pajak, Anita Plazinska, Krzysztof Jozwiak, Lucita Jimenez, Joseph A. Kozocas, Mary J. Tanga, James E. Bupp, Irving W. Wainer,

**Supplemental Figure S2.** Figure of correlation matrix for pKi values determined with [ $^3$ H]-CGP-12177 (pKi CGP), [ $^3$ H]-MFen (pKi MFen) and pEC<sub>50</sub> values in cAMP accumulation experiments (pEC<sub>50</sub> cAMP).

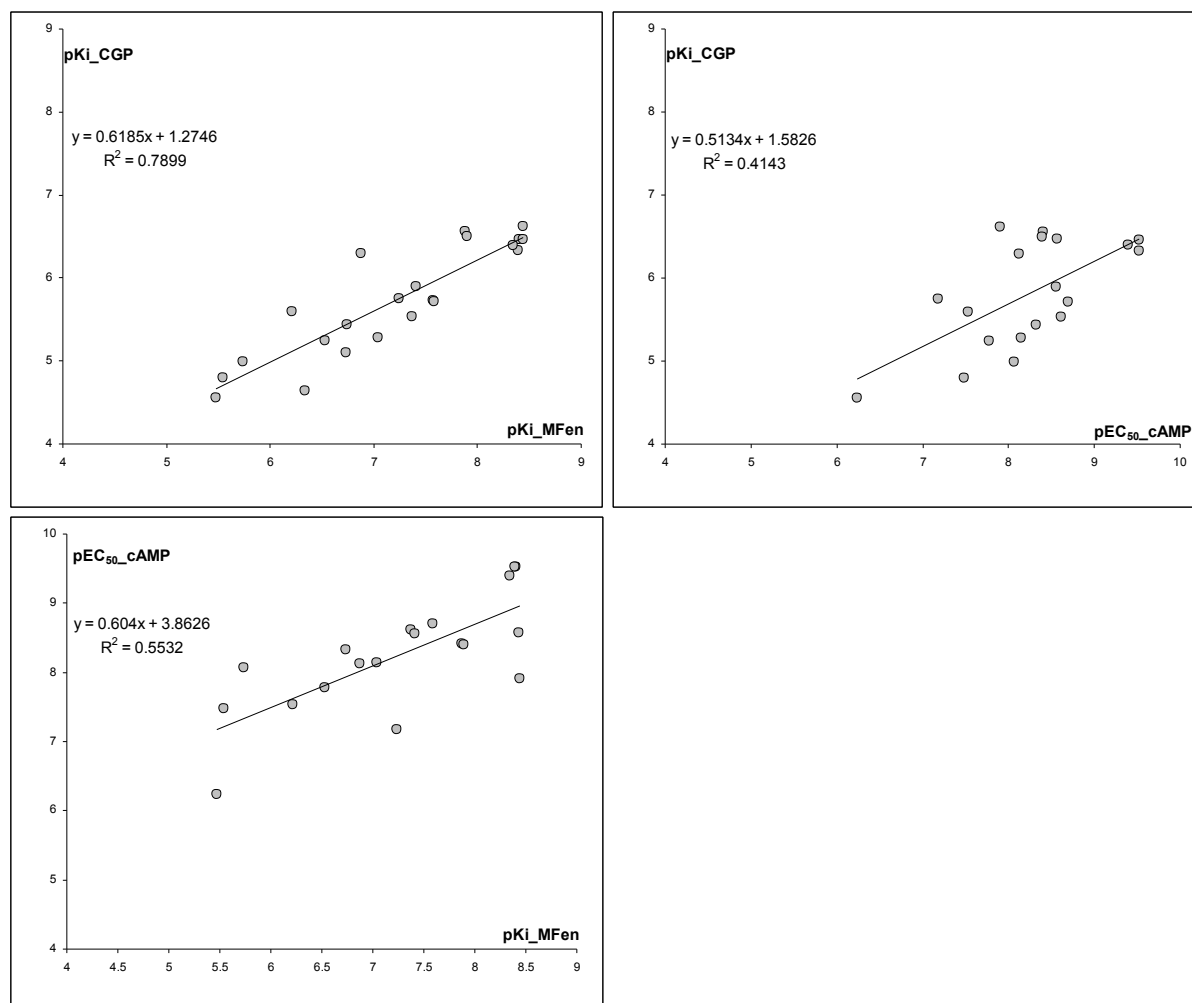

Matrix of correlation coefficients.

| R <sup>2</sup> values   | pKi_MFen | pKi_CGP | pEC <sub>50</sub> _cAMP |
|-------------------------|----------|---------|-------------------------|
| pKi_MFen                | 1        | 0.7899  | 0.5532                  |
| pKi_CGP                 |          | 1       | 0.4143                  |
| pEC <sub>50</sub> _cAMP |          |         | 1                       |
